# Supplementary material for: Correlating Structure and Morphology of Andiroba Leaf (Carapa guianensis Aubl.) by Microscopy and Fractal Theory Analyses
Source: MDPI journal article supplement (doi:10.3390/app11135848), 2021-06-23
Supplement: s1 [file s1]

## Supplementary Materials

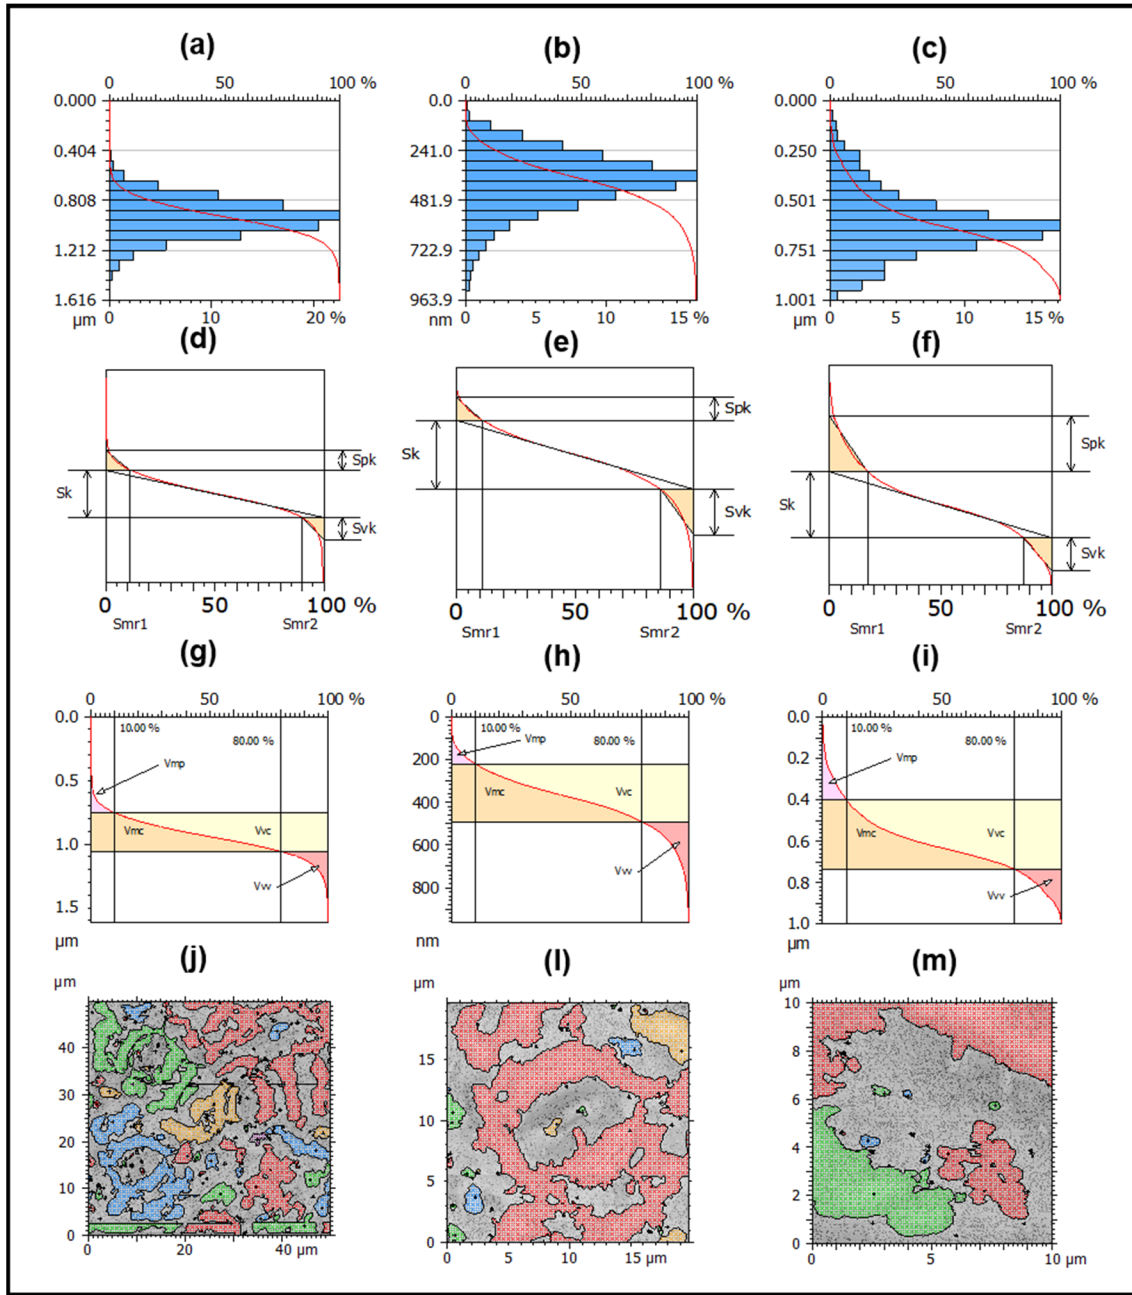

**Figure S1.** More relevant results of statistical and functional parameters, presenting of S1(a) to S1(c) height distribution histograms, S1(d) to S1(f)  $S_k$  parameters, S1(g) to S1(i) volume parameters, and S1(j) to S1(m) volume parameters for S50, S20, and S10, respectively.

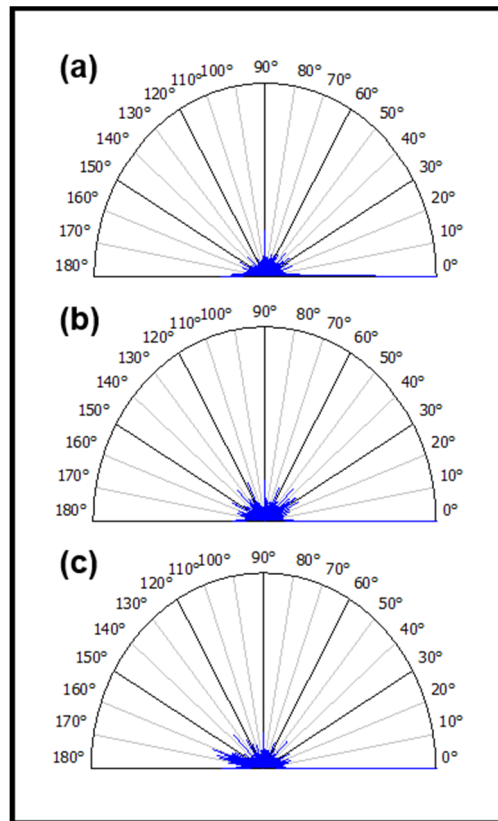

**Figure S2.** Representation of the surface texture directions of the more relevant analyzed samples for (a) S50, (b) S20, and (c) S10.

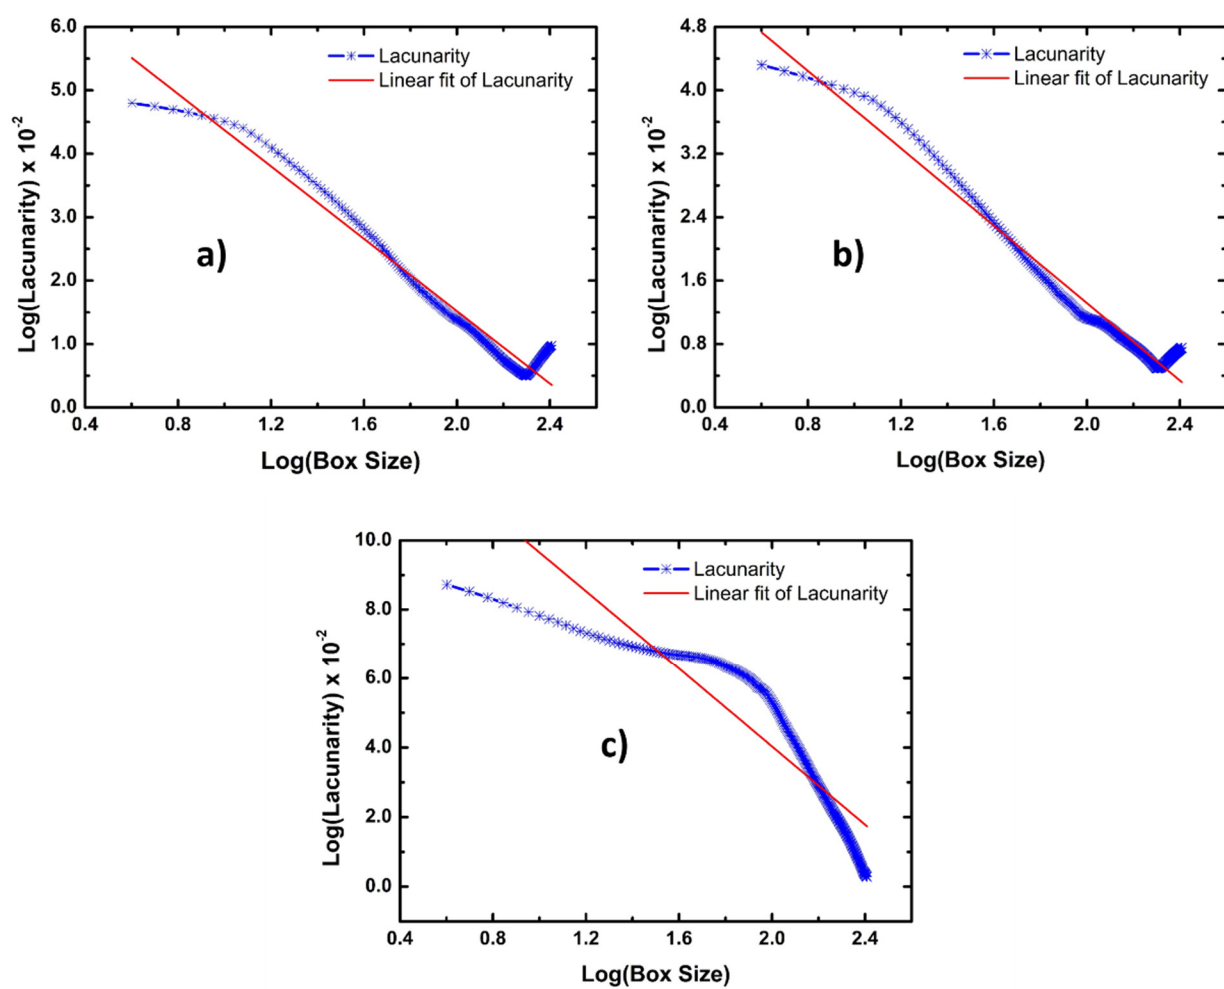

**Figure S3.** Lacunarity distribution of AFM topographic maps with sizes of (a)  $50 \times 50 \mu\text{m}$  (S50), (b)  $20 \times 20 \mu\text{m}$  (S20), and (c)  $10 \times 10 \mu\text{m}$  (S10).
